# Supplementary material
Source: PubMed Central journal article supplement (PMC4793868)

## **WEB APPENDIX**

**Table A. Table of Outcomes**

|                                                                                                                                                                                               | <b>Publication Status</b>                            |
|-----------------------------------------------------------------------------------------------------------------------------------------------------------------------------------------------|------------------------------------------------------|
| <b>PRE-SPECIFIED PRIMARY AND SECONDARY OUTCOMES</b>                                                                                                                                           |                                                      |
| <b>A. Mortality outcomes</b>                                                                                                                                                                  |                                                      |
| Post day 1 neonatal mortality (deaths between 1 to 28 days of age)                                                                                                                            | Reported in BMJ 2012                                 |
| Neonatal mortality (deaths between birth to 28 days of age)                                                                                                                                   | Reported in BMJ 2012                                 |
| Infant mortality (deaths between birth to 365 days)                                                                                                                                           | Reported in BMJ 2012                                 |
| <b>B. Newborn care practices</b>                                                                                                                                                              |                                                      |
| Initiation of breastfeeding within 1 hour                                                                                                                                                     | Reported in BMJ 2012                                 |
| Prelacteal feeds not given                                                                                                                                                                    | Reported in BMJ 2012                                 |
| Exclusive breastfeeding at 4 weeks                                                                                                                                                            | Reported in BMJ 2012                                 |
| Skin to skin contact any time on day of birth                                                                                                                                                 | Reported in BMJ 2012                                 |
| Infant clothed appropriately on first day of life                                                                                                                                             | Reported in BMJ 2012                                 |
| Infant bathed $\geq 24$ hours after birth                                                                                                                                                     | Reported in BMJ 2012                                 |
| Nothing or Gentian violet paint applied on the cord                                                                                                                                           | Reported in BMJ 2012                                 |
| <b>C. Exposure to components of intervention</b>                                                                                                                                              |                                                      |
| Proportion of neonates with at least one home visit by community health workers ( <i>Anganwadi Worker/Accredited Social Health Activist</i> ) within 48 hours of birth                        | Reported in BMJ 2012                                 |
| Proportion of neonates with at least one, at least two or at least three home visits by community health worker in the first 10 days after birth                                              | Reported in BMJ 2012                                 |
| Proportion of mothers who attended women group meetings in previous 3 months                                                                                                                  | Reported in BMJ 2012                                 |
| <b>D. Treatment seeking for illness</b>                                                                                                                                                       |                                                      |
| Proportion of neonates identified to be sick by caregivers in the previous 4 weeks, who sought care                                                                                           | Current manuscript                                   |
| Proportion of neonates identified to be sick by caregivers in the previous 4 weeks, who received timely care outside home and from an appropriate provider                                    | Current manuscript                                   |
| Proportion of infants identified to be sick by caregivers in the previous 2 weeks, and for whom care was sought outside home, at ages 6 and 12 months                                         | Current manuscript                                   |
| Proportion of infants identified to be sick by caregivers in the previous 2 weeks, and for whom timely care was sought from an appropriate provider outside home, at ages 6 and 12 months     | Current manuscript                                   |
| <b>E. Process of intervention delivery</b>                                                                                                                                                    |                                                      |
| Observations of the quality of care provided by health workers at health facilities and by <i>Accredited Social Health Activist/Anganwadi</i> workers in the community, to sick young infants |                                                      |
| Exit interviews with mothers who have recently visited a health care provider for treatment of illness in their infants, to ascertain their knowledge and skills about care for the illness   | Future publication                                   |
| Interviews with mothers of infants who were home visited recently by health workers ( <i>Anganwadi Worker/ Accredited Social Health Activist</i> )                                            |                                                      |
| <b>POST-HOC (EXPLORATORY) ANALYSIS</b>                                                                                                                                                        |                                                      |
| <b>F. Morbidity and hospitalizations</b>                                                                                                                                                      |                                                      |
| Illness reported during the neonatal period (danger signs, local infections)                                                                                                                  | Current manuscript                                   |
| Illness (diarrhea, pneumonia) in the previous 2 weeks; ascertained at ages 6 and 12 months                                                                                                    | Current manuscript                                   |
| Hospitalizations in the neonatal period (birth to 28 days), between ages 3 to 6 months, and ages 9 to 12 months                                                                               | Current manuscript (based on reviewers' suggestions) |

|                                                                                                                                                                                                                                                                                                                                                                                                                                                                                                                                                                                                                                        | <b>Publication Status</b>                               |
|----------------------------------------------------------------------------------------------------------------------------------------------------------------------------------------------------------------------------------------------------------------------------------------------------------------------------------------------------------------------------------------------------------------------------------------------------------------------------------------------------------------------------------------------------------------------------------------------------------------------------------------|---------------------------------------------------------|
| <b>G. Post neonatal infant care practices and nutritional status</b>                                                                                                                                                                                                                                                                                                                                                                                                                                                                                                                                                                   |                                                         |
| Exclusive breastfeeding at ~6 months of age                                                                                                                                                                                                                                                                                                                                                                                                                                                                                                                                                                                            | Current manuscript<br>(based on reviewers' suggestions) |
| Continued breastfeeding at 12 months of age                                                                                                                                                                                                                                                                                                                                                                                                                                                                                                                                                                                            | Current manuscript<br>(based on reviewers' suggestions) |
| Complementary feeding indicators (received solid, semi-solid or soft foods in the last 24 hours and started complementary feeding between 6 to 8 months of age; received foods from ≥4 food groups in last 24 hours; received solid, semi-solid or soft foods 3 times for breastfed infants and 4 times in non breastfed infants in last 24 hours)*                                                                                                                                                                                                                                                                                    | Current manuscript<br>(based on reviewers' suggestions) |
| Immunization coverage by 12 months of age for BCG, the third dose of DPT and measles vaccines                                                                                                                                                                                                                                                                                                                                                                                                                                                                                                                                          | Current manuscript<br>(based on reviewers' suggestions) |
| Nutritional status at 12 months of age: proportion wasted and stunted                                                                                                                                                                                                                                                                                                                                                                                                                                                                                                                                                                  | Current manuscript<br>(based on reviewers' suggestions) |
| <b>H. Other possible publications in the future</b>                                                                                                                                                                                                                                                                                                                                                                                                                                                                                                                                                                                    |                                                         |
| Operational lessons for the national government from implementing IMNCI including cost effectiveness of the intervention. Cost of delivering IMNCI intervention through community level workers (J Trop Pediatr 2013;59:489-95). This analysis was done at the request of the Ministry of Health. A small facility survey to report the cost of delivery of child health care services through community health care workers. The manuscript also includes data from the District Level Household and Facility Survey-3 ( <a href="http://www.rchiips.org/pdf/rch3/report/HR.pdf">http://www.rchiips.org/pdf/rch3/report/HR.pdf</a> ). |                                                         |
| Was the IMNCI intervention equitable i.e. reached different socioeconomic and other strata equally                                                                                                                                                                                                                                                                                                                                                                                                                                                                                                                                     |                                                         |
| Observational analysis, examples:                                                                                                                                                                                                                                                                                                                                                                                                                                                                                                                                                                                                      |                                                         |
| Analysis of verbal autopsies to ascertain causes of still births, neonatal and post neonatal deaths                                                                                                                                                                                                                                                                                                                                                                                                                                                                                                                                    |                                                         |
| Use of Oxytocin and birth outcomes in pregnant women in Haryana                                                                                                                                                                                                                                                                                                                                                                                                                                                                                                                                                                        |                                                         |
| Predictors of mortality and morbidity in infants                                                                                                                                                                                                                                                                                                                                                                                                                                                                                                                                                                                       |                                                         |

---

\*World Health Organization. *Indicators for assessing infant and young child feeding practices*, WHO 2008

## Table B. Classification of Health Care Providers

It was our *a priori* decision to categorize the providers as appropriate and inappropriate based on the rationale provided in the table below.

| Category of health care provider                    | Appropriate?<br>Yes/No | Reason                                                                                                                                                                                                                                                                                                                                                    |
|-----------------------------------------------------|------------------------|-----------------------------------------------------------------------------------------------------------------------------------------------------------------------------------------------------------------------------------------------------------------------------------------------------------------------------------------------------------|
| <i>Anganwadi</i> worker                             | Yes                    | Government employee who has attended 30 days of the <i>Anganwadi</i> worker training course conducted by the government in both intervention and control areas. Additionally trained in IMNCI through the study in the intervention areas                                                                                                                 |
| Accredited Social Health Activist                   | Yes                    | Government employee who has attended 42 weeks of the Accredited Social Health Activist training course conducted by the government in both intervention and control areas. Additionally trained in IMNCI through the study in the intervention areas                                                                                                      |
| Auxiliary Nurse Midwife                             | Yes                    | Government employee who has attended 1.5 years of Auxiliary Nurse Midwife training course conducted by the government in both intervention and control areas. Additionally trained in IMNCI through the study in the intervention areas.                                                                                                                  |
| Primary Health Centre physician                     | Yes                    | Government employee, usually a medical graduate, sometimes with postgraduate specialization, in both intervention and control areas. Additionally trained in IMNCI through the study in the intervention areas                                                                                                                                            |
| Chemist                                             | No                     | No formal clinical training. Usually prescribe over the counter medicines without examining the child, based on past experience or information provided by company representatives                                                                                                                                                                        |
| Private practitioner in village or outside village* | No                     | These informal providers (including traditional healers) are called “private doctors” by the population. Almost all of them have no medical degree. They usually have past experience of working with a medical practitioner. They do not display their qualifications and refuse to answer questions about their qualifications (see photographs below). |
| Private nursing home and hospital                   | Yes                    | Medically qualified providers, with postgraduate specialization. They display their qualifications on boards outside the facility. The population differentiates them from informal providers by calling them “private nursing homes”.                                                                                                                    |
| District/Government hospital                        | Yes                    | Recruit medically qualified doctors usually MBBS, sometimes with postgraduate degree.                                                                                                                                                                                                                                                                     |

\*Based on our experience of the study area, and enumeration of providers during this study for the sensitization session, we know that in this community it is challenging to ascertain qualifications of private providers except those with medical qualifications, who are almost always based in towns. The private providers practicing in villages do not share their qualifications as they are apprehensive that a complaint may be registered against them and forced to discontinue practice in the community. This is particularly true in Haryana where there are periodic drives against such providers. These providers may also take offence or provide

wrong information about their qualifications and there is no way to confirm what is reported. It is difficult to extract information from caregivers about the type of provider visited as they are only able to differentiate government workers, private or government hospitals, and private providers based in villages.

### Private practitioners in the village

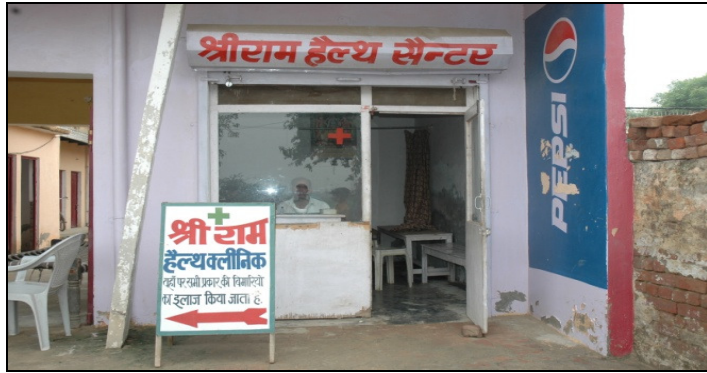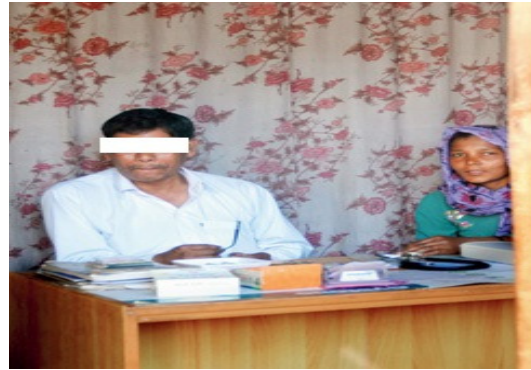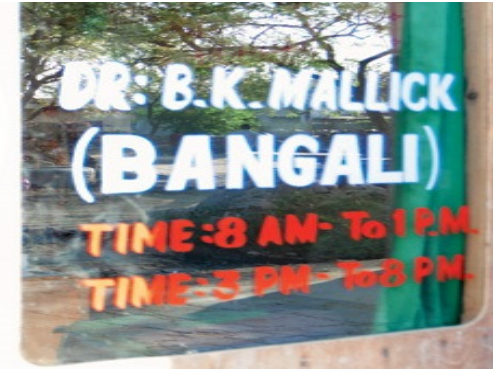

Supplement: mazs016787.ww1_default.pdf [file mazs016787.ww1_default.pdf]
